# Supplementary material for: Influence of host materials on degradation of phosphorescent organic light-emitting diodes under electrical stress
Source: Royal Society of Chemistry journal article supplement (doi:10.1039/d2tc04462e), 2023-01-01
Supplement: d2tc04462e1.pdf [file d2tc04462e1.pdf]

## **Influence of host materials on degradation of phosphorescent organic light-emitting diodes under electrical stress**

Jianhui Luo, Yibing Wu, Chengwei Lin, Shu Xiao, Xianfeng Qiao, Dezhi Yang, Yanfeng Dai, Qian Sun, Jiangshan Chen, and Dongge Ma\*

Institute of Polymer Optoelectronic Materials and Devices, Guangdong Provincial Key Laboratory of Luminescence from Molecular Aggregates, Guangdong-Hong Kong-Macao Joint Laboratory of Optoelectronic and Magnetic Functional Materials, State Key Laboratory of Luminescent Materials and Devices, South China University of Technology, Guangzhou 510640, China

E-mail: [msdgm@scut.edu.cn](mailto:msdgm@scut.edu.cn)

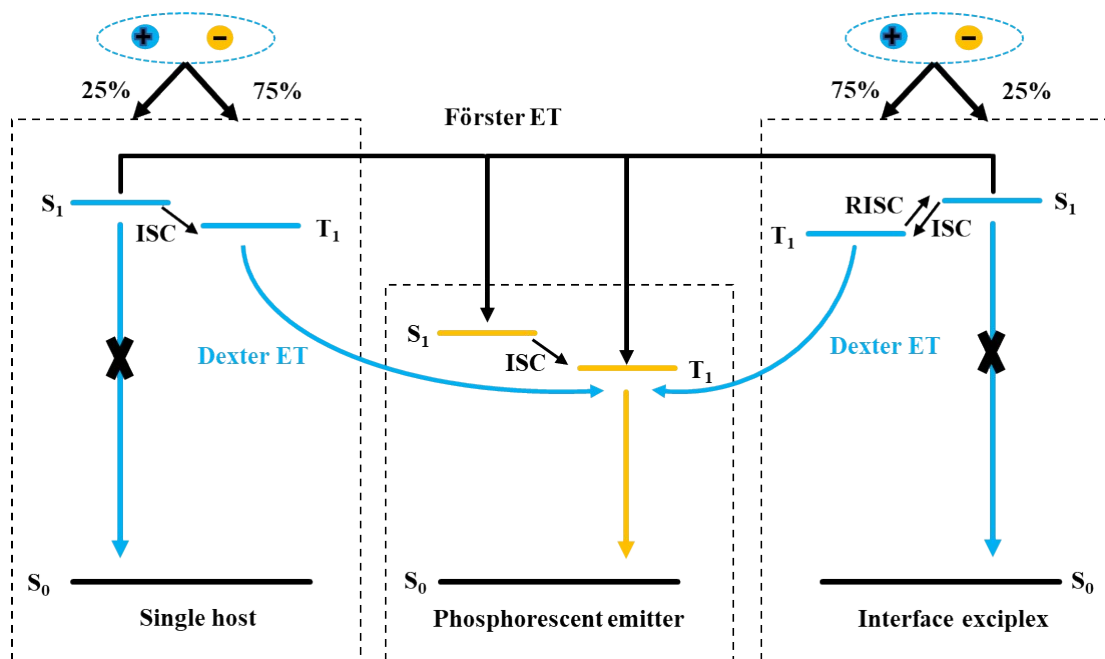

**Fig. S1** Energy transfer and emission processes of the resulting yellow PHOLEDs for the case of single host and interface exciplex.

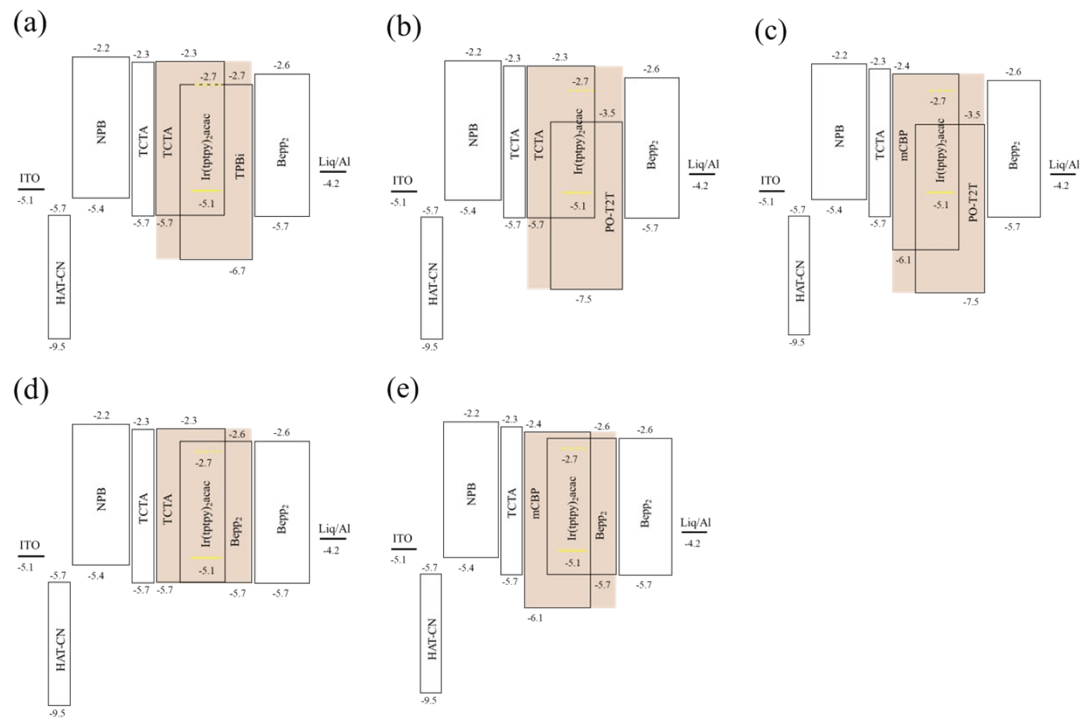

**Fig. S2** Energy level diagrams of the resulting yellow PhOLEDs based on co-host. (a) TCTA:TPBi, (b) TCTA:PO-T2T, (c) mCBP:PO-T2T, (d) TCTA:Bepp<sub>2</sub>, and (e) mCBP:Bepp<sub>2</sub>.

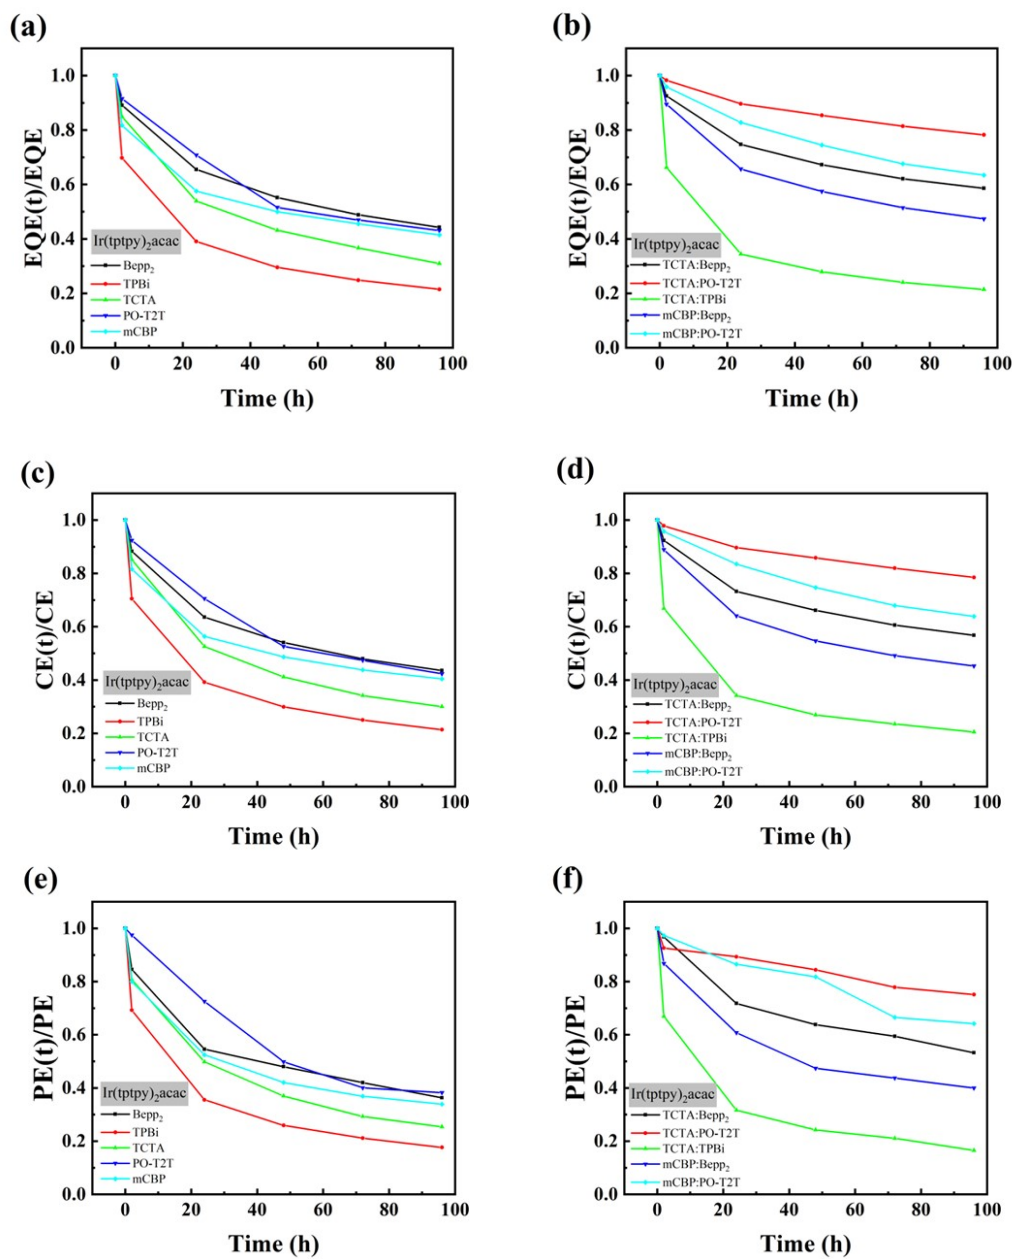

**Fig. S3** Change of EQE(t)/EQE, CE(t)/CE and PE(t)/PE versus aging time in the resulting yellow PhOLEDs with different hosts at 5 mA/cm<sup>2</sup>. (a), (c) and (e) single host devices, (b), (d) and (f) co-host devices. (EQE, CE and PE are those of the pristine devices)

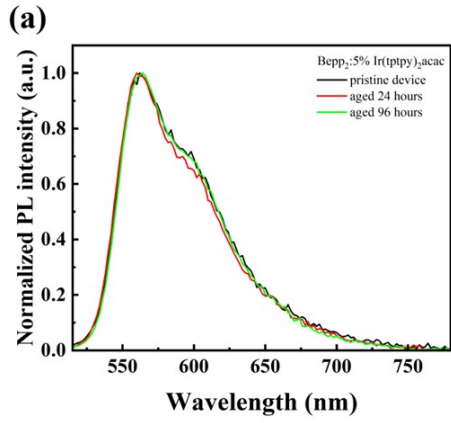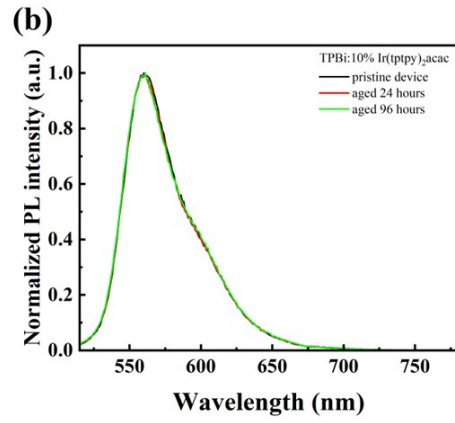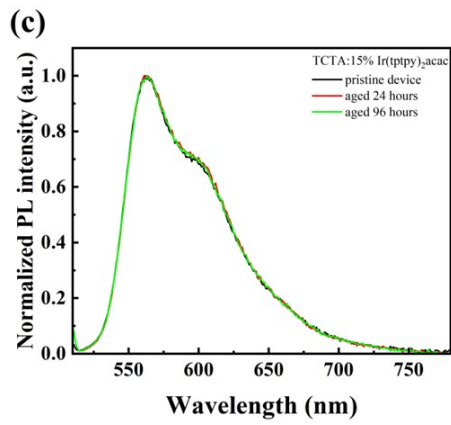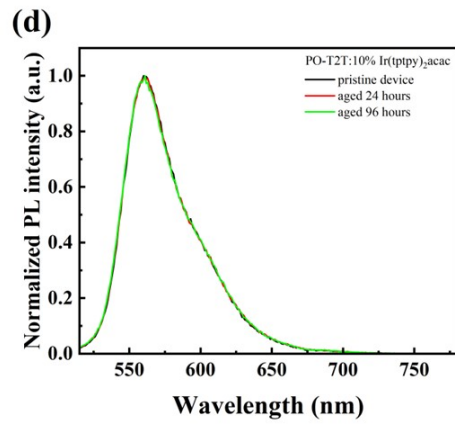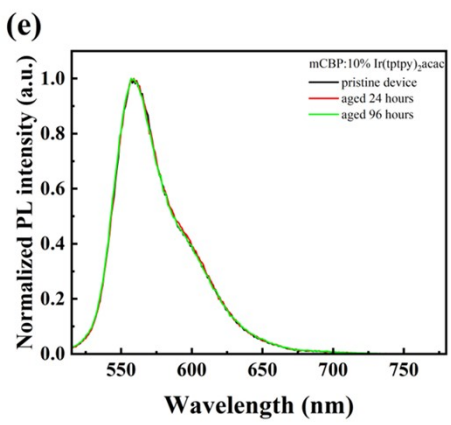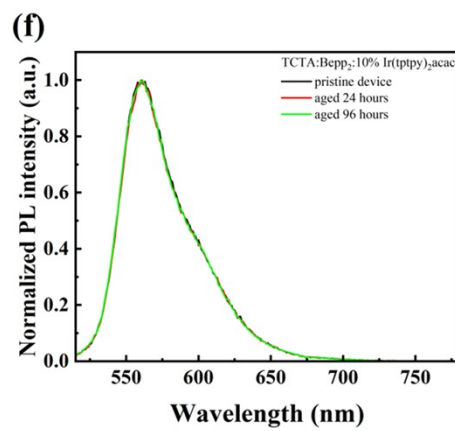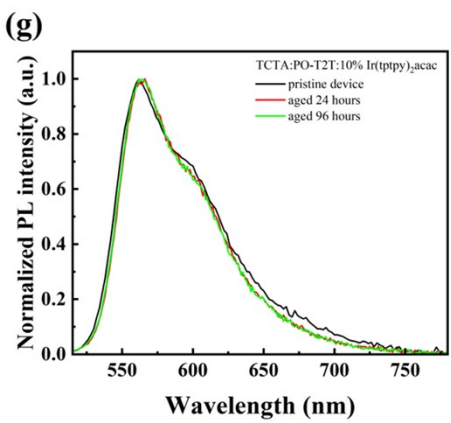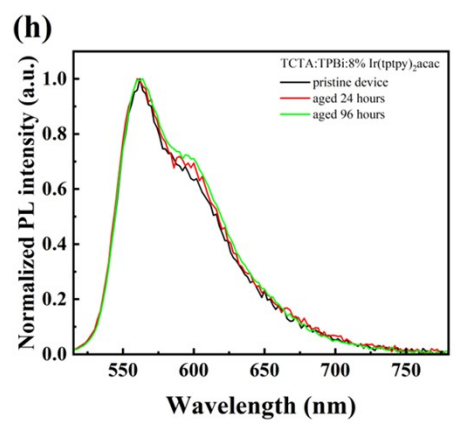

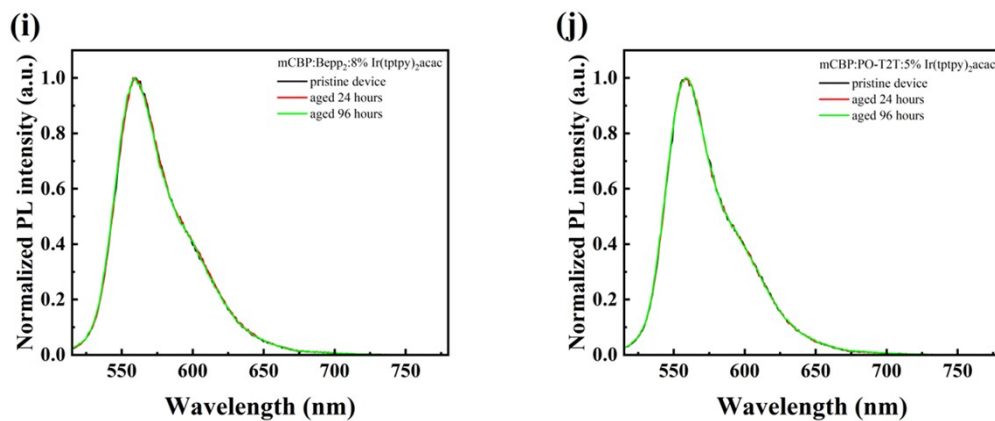

**Fig. S4** Normalized PL spectrum characteristics of the resulting yellow PhOLEDs with different hosts at pristine, aging 24 hours and aging 96 hours. (a) Bepp<sub>2</sub>, (b) TPBi, (c) TCTA, (d) PO-T2T, (e) mCBP, (f) TCTA:Bepp<sub>2</sub>, (g) TCTA:PO-T2T, (h) TCTA:TPBi, (i) mCBP:Bepp<sub>2</sub> and (j) mCBP:PO-T2T.

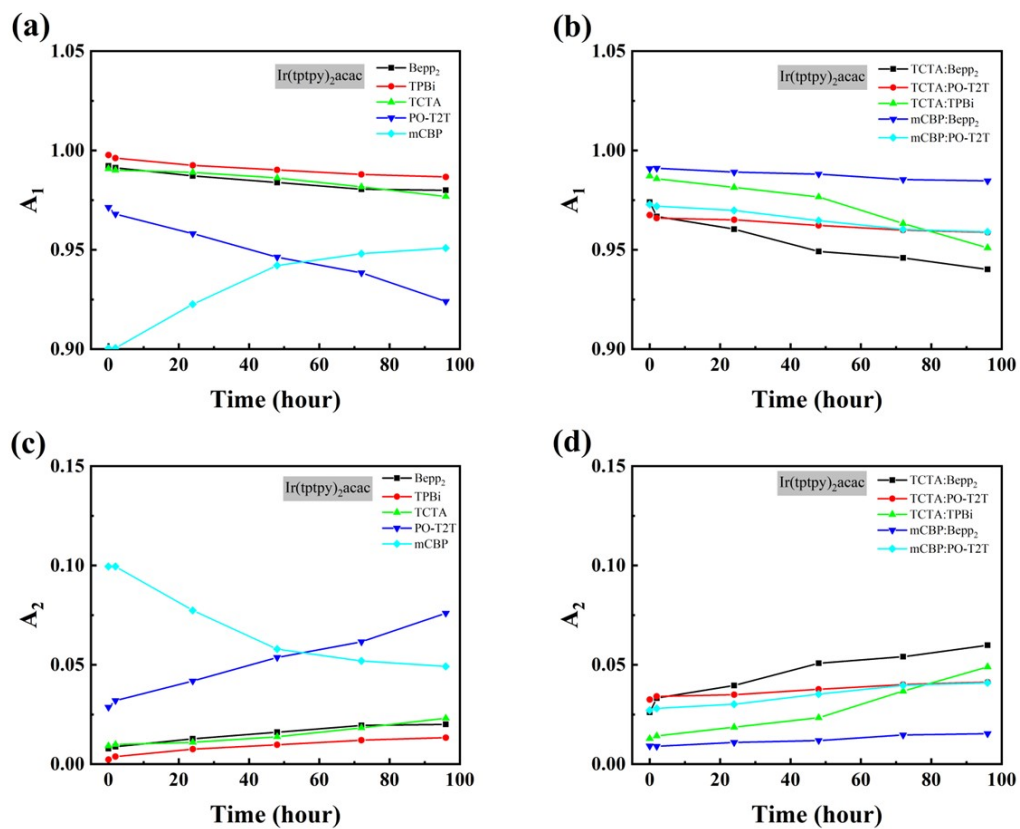

**Fig. S5.** Fitting parameter  $A_1$  of (a) the single host and (b) co-host devices, and Fitting parameter  $A_2$  of (c) the single host and (d) co-host devices by double exponential function against aging time.

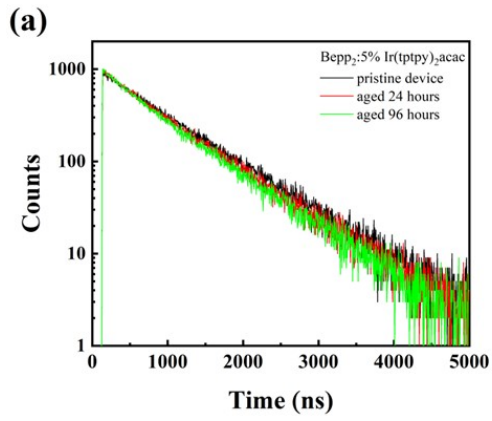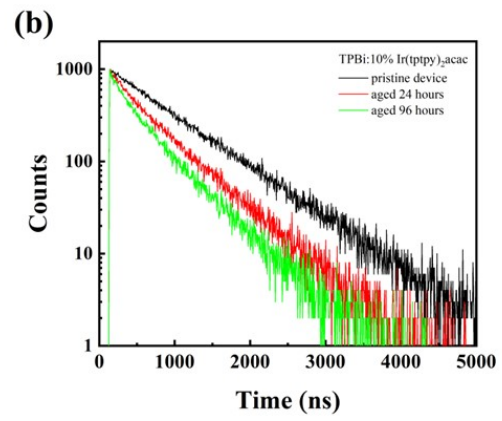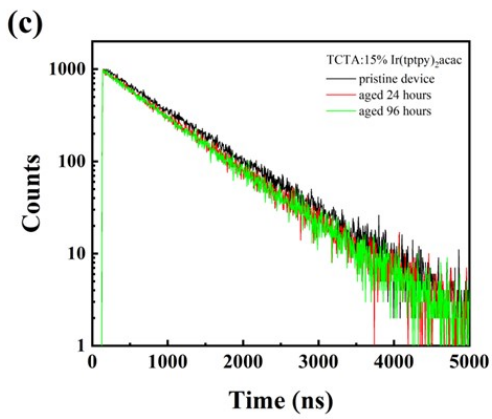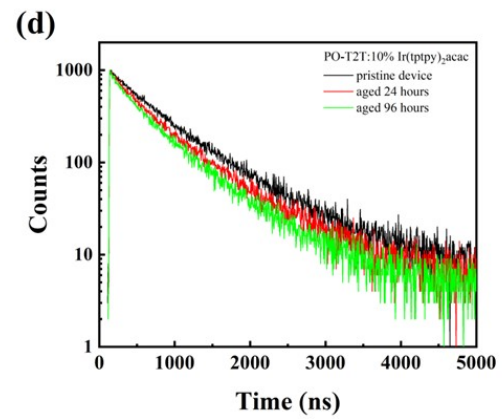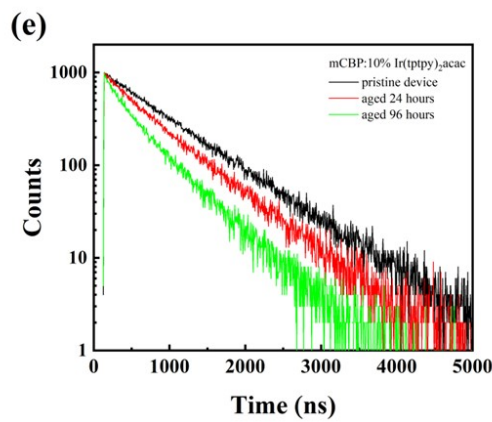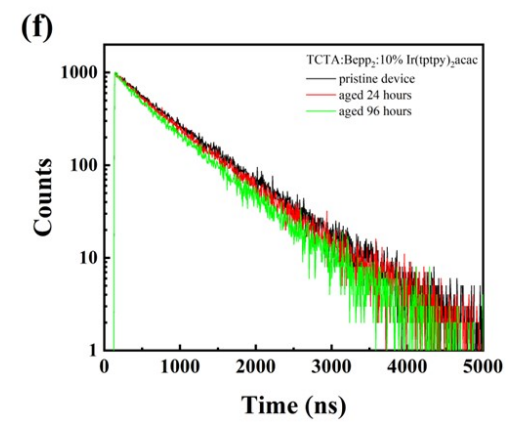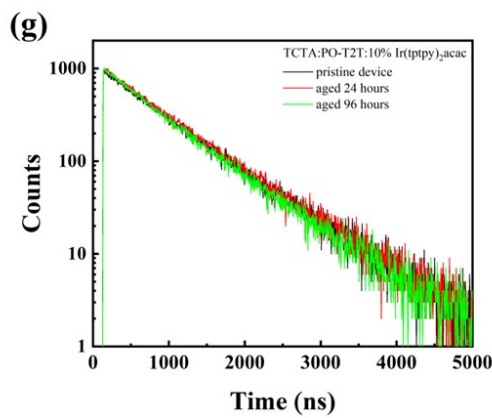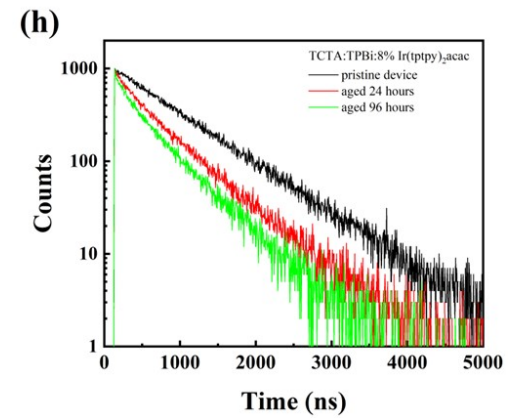



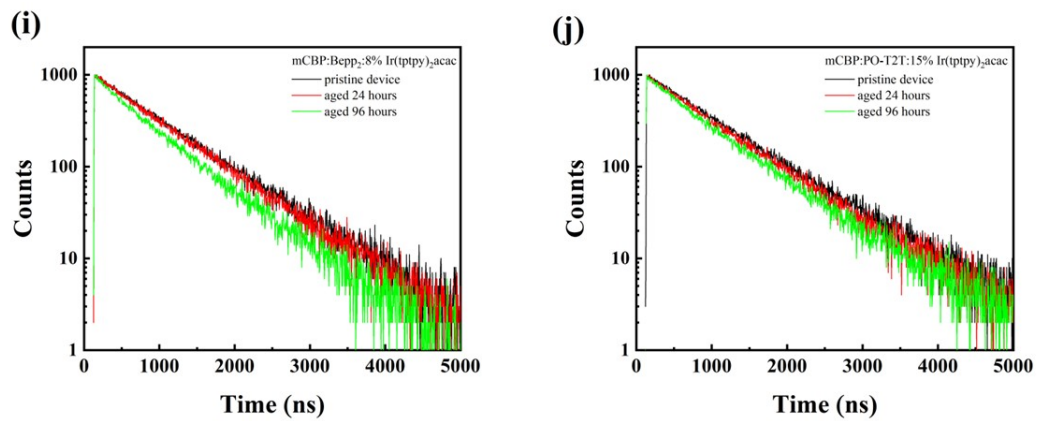

**Fig. S6.** TRPL spectrum characteristics of the resulting yellow PhOLEDs with different hosts at pristine, aging 24 hours and aging 96 hours. (a) Bepp<sub>2</sub>, (b) TPBi, (c) TCTA, (d) PO-T2T, (e) mCBP, (f) TCTA:Bepp<sub>2</sub>, (g) TCTA:PO-T2T, (h) TCTA:TPBi, (i) mCBP:Bepp<sub>2</sub> and (j) mCBP:PO-T2T.
